# Supplementary material for: Dry reforming of methane over single-atom Rh/Al2O3 catalysts prepared by exsolution
Source: Royal Society of Chemistry journal article supplement (doi:10.1039/d2cy02126a), 2023-01-01
Supplement: d2cy02126a1.pdf [file d2cy02126a1.pdf]

## Supporting information

### Synthesis of co-precipitated Rh@Al<sub>2</sub>O<sub>3</sub> catalysts <sup>[1]</sup>

The alumina rhodium slurry was prepared by dispersing 0.005 wt% rhodium in alumina. Subsequently, aluminiumchloride was added in a molar ratio of 3.14:1 and the solution was stirred for 3h. Then, 25% ammonia was added to adjust the pH to 10. This was subsequently filtered and washed with deionized water and ethanol. The precipitate was thereafter dried in a vacuum oven and calcined at 900°C for 4h.

The acid wash was performed by pouring 120 mL 1M HCl over the catalyst in a funnel. Thereafter, the catalyst was neutralized with water and dried at 120°C for 1 hour.

### CO-Yield evaluation

The CO yield was determined by comparing the CO output flow with the CH<sub>4</sub> and CO<sub>2</sub> input flow into, see eq.1

$$\frac{CO_{out}}{CO_{2,in} + CH_{4,in}} * 100\% \quad \text{eq S1}$$

Whereas for the turnover frequency the total molecular amount of CO was produced per rhodium site per second, see eq. 2

$$\frac{CO_{out}}{mol_{Rh} * time (s)} * 100\% \quad \text{eq S2}$$

The amounts were based on the signal in a thermal conductivity detector in a GC, where the carrier gas N<sub>2</sub> was used as an internal standard.

### Electron Paramagnetic simulation

The simulation was done in EasySpin <sup>[2]</sup>. All X-band EPR spectra were obtained at 10 K with mod. amp. 4.000 G and power 0.6325 mW. Microwave freq. 9.643733 (fresh), 9.647212 (activated), 9.644264 (activated, washed), 9.648861 (activated, washed, activated) GHz.

Simulation parameters for the activated sample were: S=0.5, g=[2.016 2.001 1.901], NucS=Rh, n=1  
A=[68 0 0] MHz, g<sub>Strain</sub>=[0.004 0.004 0.040]

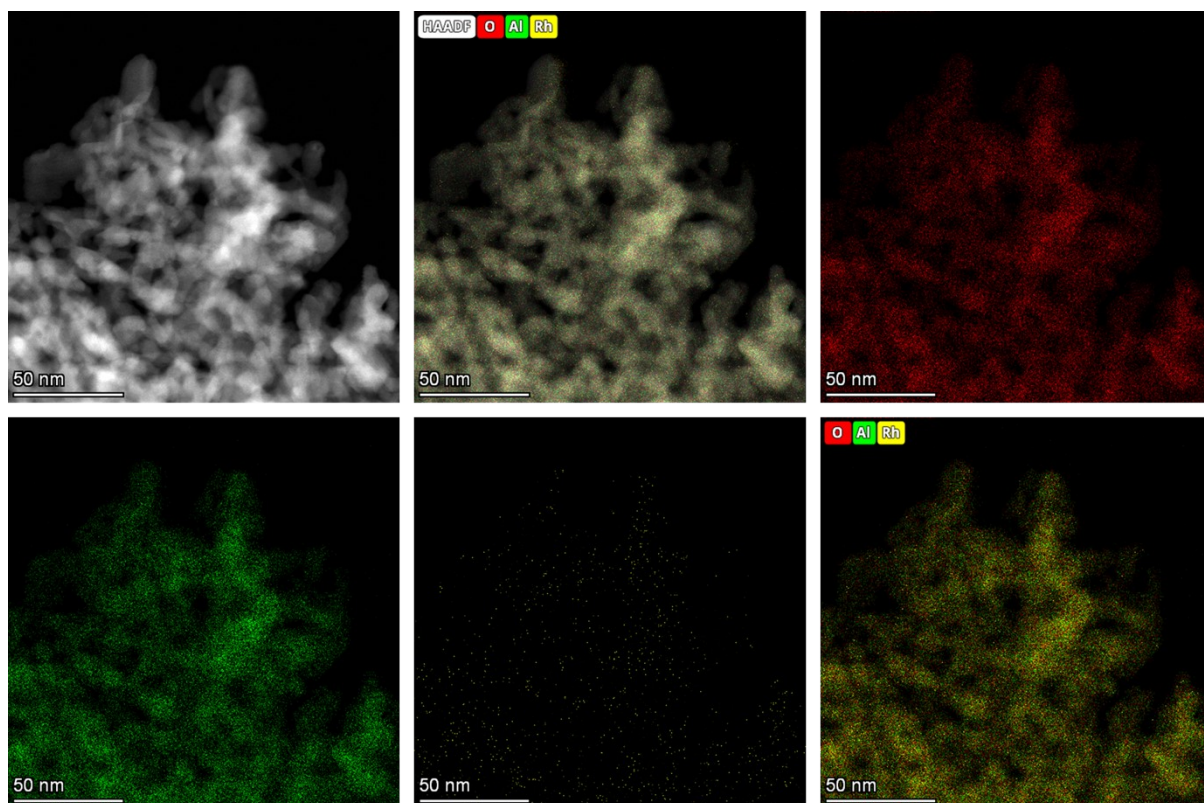

Figure S1 – TEM-EDX mappings of the zoomed-out photo in Figure 1c. No signs of Rh agglomeration above the noise level was observed.

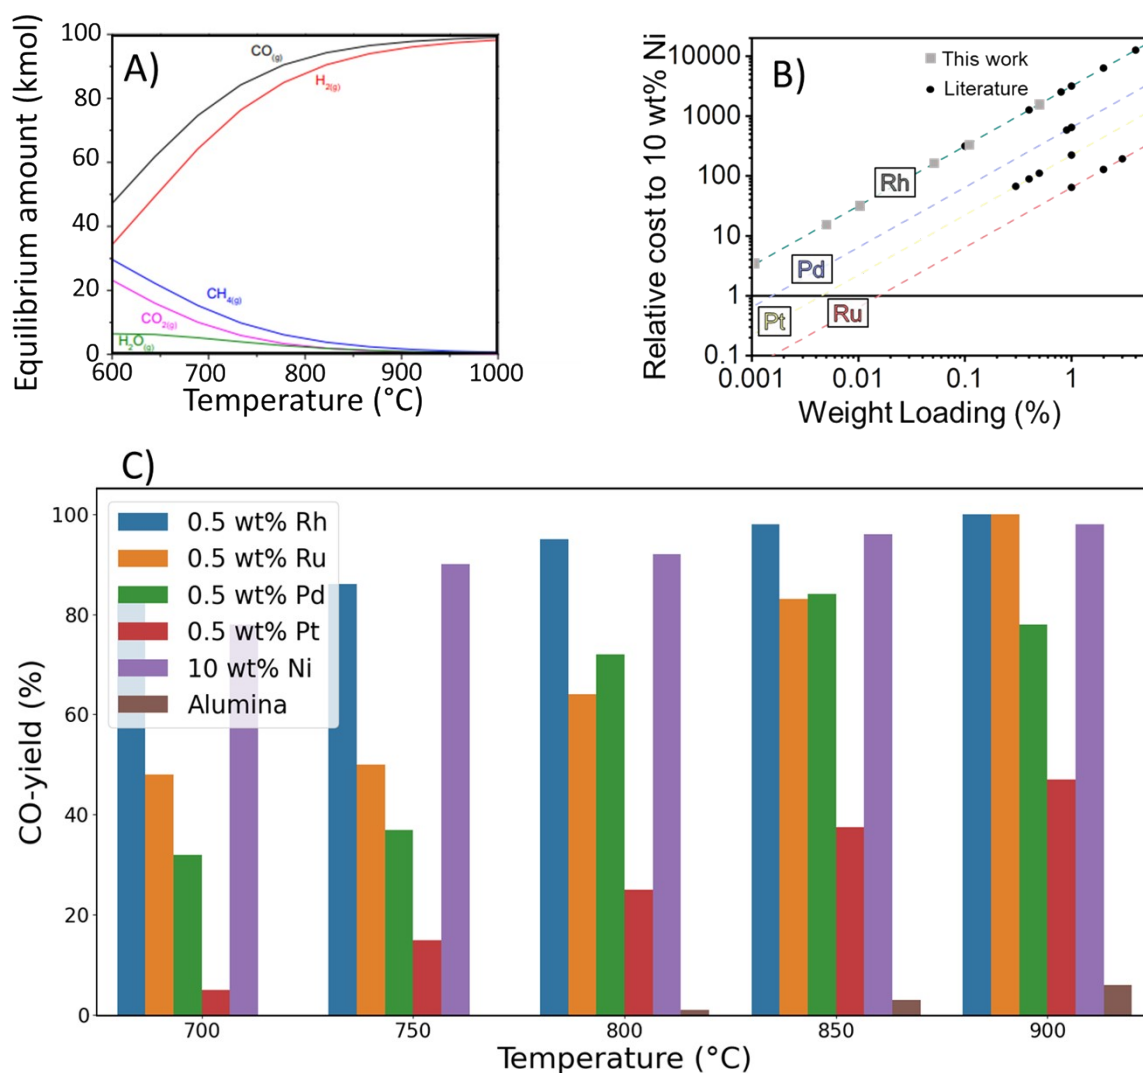

Figure S2 – Theoretical temperature dependent CO<sub>2</sub>-yield and the respective gas compositions for DRM (a). Relative costs for 10 wt% Ni supported on Al<sub>2</sub>O<sub>3</sub> compared to similar weight loading in terms of maximal atom occupancy (b). Temperature dependent conversions of the individual noble metals on Al<sub>2</sub>O<sub>3</sub>. This approached the theoretical yield (c).

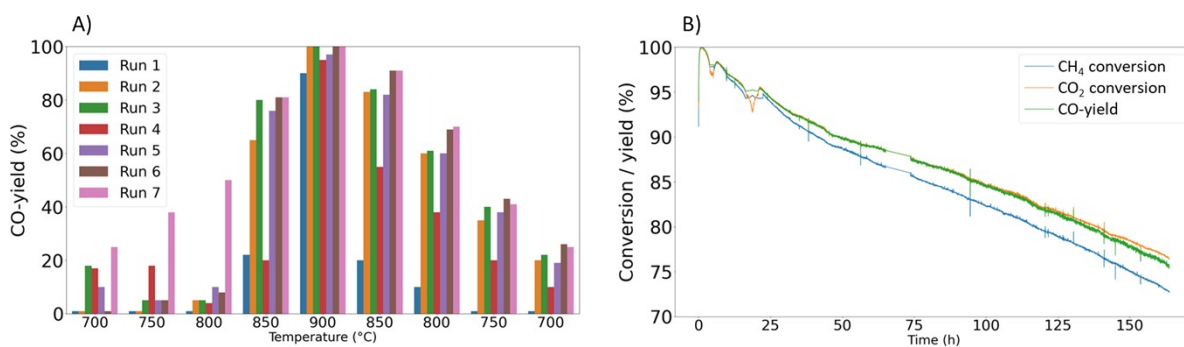

Figure S3 – (A) Complete runs and (B) the stability test for the 0.005wt% Rh/Al<sub>2</sub>O<sub>3</sub> loaded catalysts at 900°C in terms of performance of all yields and conversions. A decrease in activity due to agglomeration was observed.

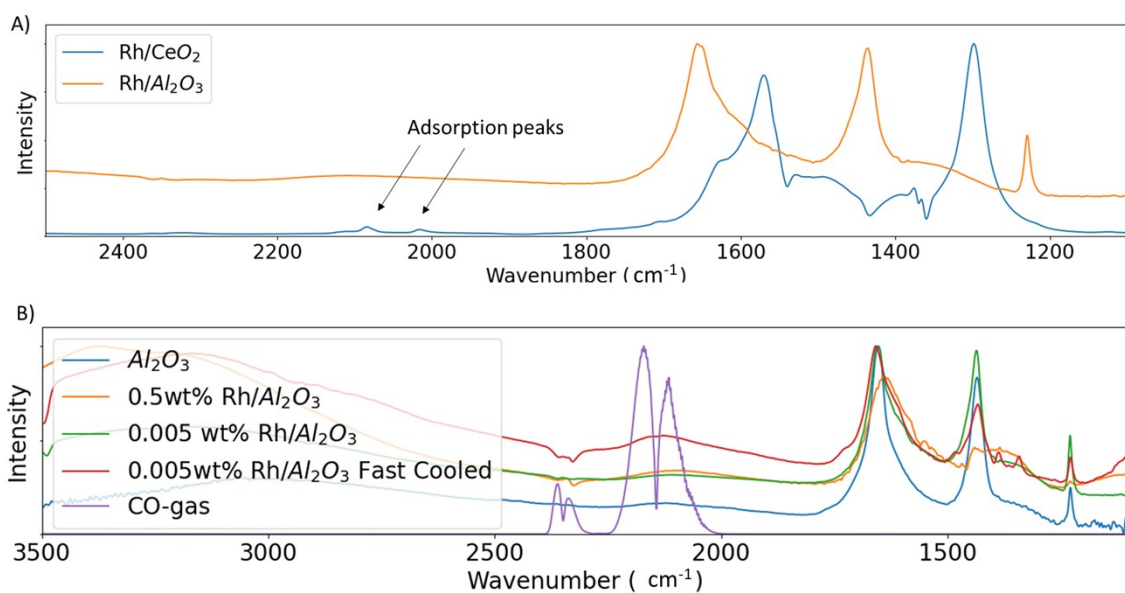

Figure S4 – (A) CO-DRIFTS on Rh/CeO<sub>2</sub> and Rh/Al<sub>2</sub>O<sub>3</sub> catalysts showing the differences in adsorption and dissolution behavior. (B) Comparable overlap of adsorbed CO molecules with CO-gas.

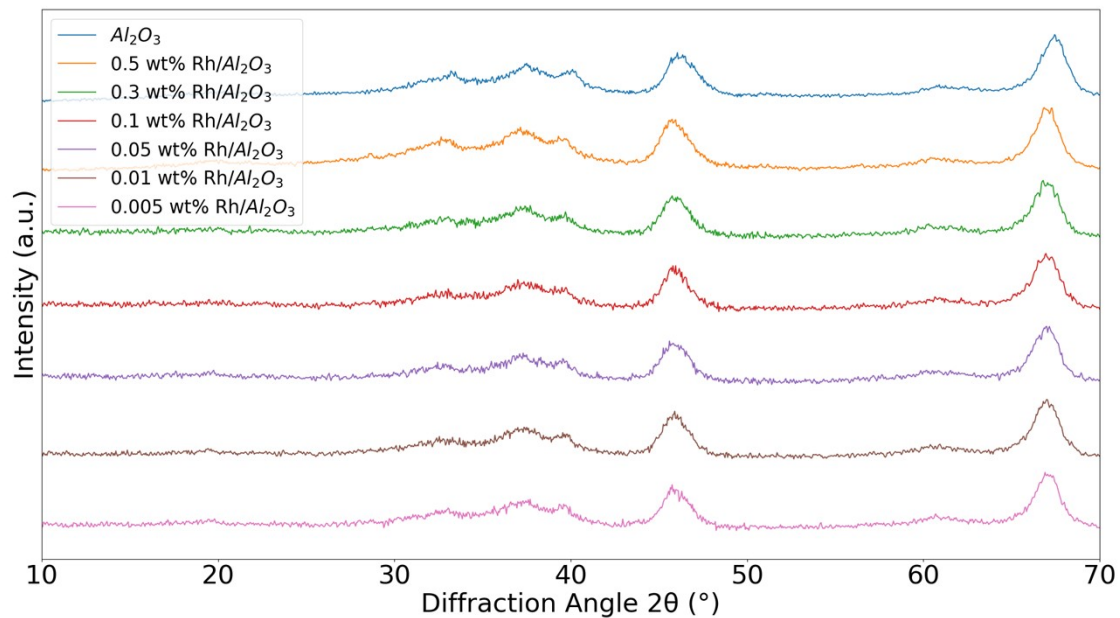

Figure S5 – XRD of the different Rh loadings, showing the same diffraction pattern as Al<sub>2</sub>O<sub>3</sub> for the differently loaded samples.

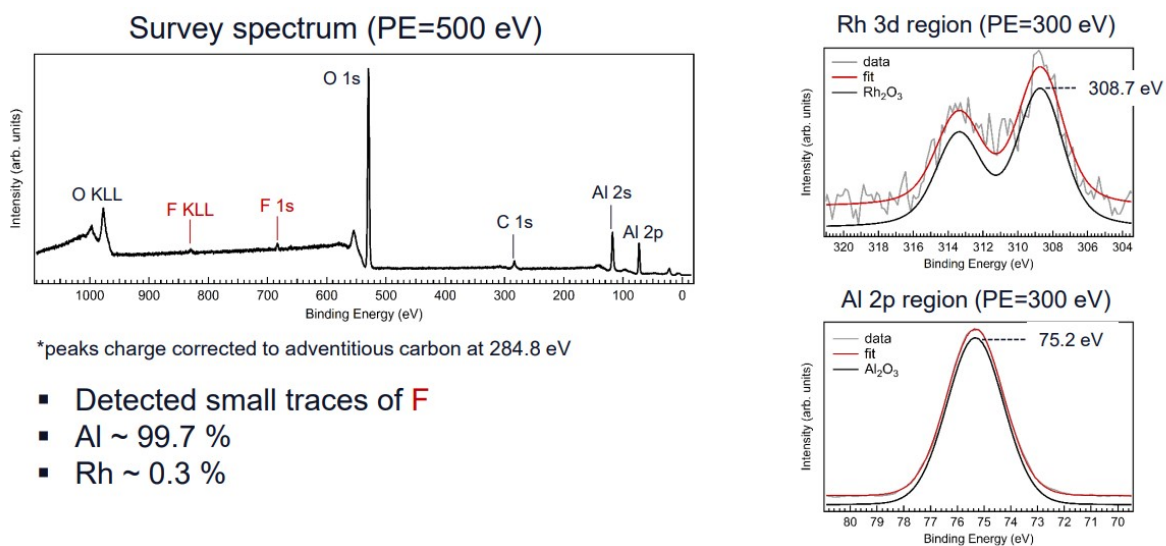

Figure S6 – XPS spectrum of the Rh/Al<sub>2</sub>O<sub>3</sub> powder. Two clear peaks are observed at 314 eV and 309 eV, matching the binding energies characteristic for Rh<sub>2</sub>O<sub>3</sub>. The surface content approximates 0.3 Rh/Al metal % (converting to approximately 0.5 wt% Rh/Al<sub>2</sub>O<sub>3</sub>), indicating Rh migration from the surface into the subsurface of Al<sub>2</sub>O<sub>3</sub> (and not to the main bulk).

## References

- [1] A. Eftekhari, B. Modahedi, G. Dini, M. Milani, *J. Eur. Ceram. Soc.* **2018**, *38*, 3297-3304.
- [2] S. Stoll, A. Schweiger, *J. Magn. Reson.* **2006**, *178*, 42-55
